# Supplementary material for: A novel polyoxovanadate-based Co-MOF: highly efficient and selective oxidation of a mustard gas simulant by two-site synergetic catalysis
Source: Royal Society of Chemistry journal article supplement (doi:10.1039/d0ta00537a), 2020-01-01
Supplement: d0ta00537a1.pdf [file d0ta00537a1.pdf]

## Supporting Information

# A novel polyoxovanadate-based Co–MOF: highly efficient and selective oxidation of mustard gas simulant by two-site synergetic catalysis

Key Laboratory of Polyoxometalate Science of the Ministry of Education, College of Chemistry,

Northeast Normal University, Changchun, Jilin 130024, P. R. China

\*E-mail:

liusx@nenu.edu.cn

## Table of Contents

|                                                                                                      |     |
|------------------------------------------------------------------------------------------------------|-----|
| 1. Crystallographic Data and Structure Refinements.....                                              | S3  |
| 2. BVS Results.....                                                                                  | S4  |
| 3. XPS Spectra of V-Co-MOF and V-Ni-MOF.....                                                         | S4  |
| 4. PXRD Patterns of V-Co-MOF and V-Ni-MOF.....                                                       | S5  |
| 5. FTIR Spectra of V-Co-MOF and V-Ni-MOF.....                                                        | S5  |
| 6. TGA Curves of V-Co-MOF and V-Ni-MOF.....                                                          | S6  |
| 7. BET Analysis of V-Co-MOF and V-Ni-MOF.....                                                        | S6  |
| 8. Mass Spectrum of CEESO.....                                                                       | S7  |
| 9. <sup>1</sup> H-NMR Spectra of CEES Oxidation Process with V-Co-MOF as Catalyst.....               | S7  |
| 10. The influence of the Quantity of Catalyst and Oxidant for CEES Oxidation.....                    | S8  |
| 11. Kinetic Analysis of CEES Oxidation for V-Co-MOF and V-Ni-MOF.....                                | S8  |
| 12. PXRD Patterns of NaK{V <sub>2</sub> O <sub>6</sub> }.....                                        | S9  |
| 13. FTIR Spectra of CEES Molecules Absorbed on V-Co-MOF and V-Ni-MOF.....                            | S9  |
| 14. XPS Spectra of Co <sup>2+</sup> in V-Co-MOF-A and Ni <sup>2+</sup> in V-Ni-MOF-A.....            | S10 |
| 15. FTIR Spectra and Raman Spectra of V-Co-MOF-treating with 30% H <sub>2</sub> O <sub>2</sub> ..... | S10 |
| 16. Comparison of CEES Catalytic Oxidation by Different Catalysts.....                               | S11 |
| 17. References.....                                                                                  | S12 |

## 1. Crystallographic Data and Structure Refinements

**Table S1.** Crystallographic data and structure refinements of V-Co-MOF and V-Ni-

MOF

| Name                                             | V-Co-MOF                                                                       | V-Ni-MOF                                                                        |
|--------------------------------------------------|--------------------------------------------------------------------------------|---------------------------------------------------------------------------------|
| Empirical formula                                | C <sub>12</sub> H <sub>10</sub> CoN <sub>4</sub> O <sub>6</sub> V <sub>2</sub> | C <sub>14</sub> H <sub>22</sub> N <sub>6</sub> O <sub>8</sub> V <sub>2</sub> Ni |
| Formula weight                                   | 467.05                                                                         | 562.96                                                                          |
| Temperature (K)                                  | 298                                                                            | 298                                                                             |
| Wave length (Å)                                  | 0.71073                                                                        | 0.71073                                                                         |
| Crystal system                                   | monoclinic                                                                     | monoclinic                                                                      |
| Space group                                      | C2/c                                                                           | P2 <sub>1</sub> /n                                                              |
| a (Å)                                            | 15.592(5)                                                                      | 9.3037(4)                                                                       |
| b (Å)                                            | 5.5370(17)                                                                     | 24.5253(9)                                                                      |
| c (Å)                                            | 19.668(6)                                                                      | 9.8451(3)                                                                       |
| α (deg)                                          | 90                                                                             | 90                                                                              |
| β (deg)                                          | 111.991(6)                                                                     | 112.9020(10)                                                                    |
| γ (deg)                                          | 90                                                                             | 90                                                                              |
| Volume (Å <sup>3</sup> )                         | 1574.4(8)                                                                      | 2069.33(13)                                                                     |
| Z, D <sub>calc</sub> (Mg/m <sup>3</sup> )        | 4, 1.970                                                                       | 4, 1.807                                                                        |
| Absorption coefficient (mm <sup>-1</sup> )       | 2.243                                                                          | 1.841                                                                           |
| F (000)                                          | 924.0                                                                          | 1144.0                                                                          |
| Crystal size (mm <sup>3</sup> )                  | 0.25 × 0.23 × 0.22                                                             | 0.21 × 0.2 × 0.19                                                               |
| θ range (deg)                                    | 4.466 to 50.178                                                                | 4.788 to 50.122                                                                 |
| index range (deg)                                | -18 ≤ h ≤ 11, -6 ≤ k ≤ 6, -23 ≤ l ≤ 23                                         | -11 ≤ h ≤ 11, -29 ≤ k ≤ 29, -11 ≤ l ≤ 11                                        |
| Reflections collected / unique                   | 4372 / 1401 [Rint = 0.0289]                                                    | 19036 / 3660 [Rint = 0.0306]                                                    |
| Data / restraints / parameters                   | 1401 / 0 / 114                                                                 | 3660 / 0 / 286                                                                  |
| Goodness-of-fit on F <sup>2</sup>                | 1.044                                                                          | 1.105                                                                           |
| R <sub>1</sub> , wR <sub>2</sub> (I > 2σ(I))     | 0.0383, 0.0824                                                                 | 0.0335, 0.0863                                                                  |
| R <sub>1</sub> , wR <sub>2</sub> (all data)      | 0.0497, 0.0876                                                                 | 0.0372, = 0.0884                                                                |
| Largest diff. peak and hole (e Å <sup>-3</sup> ) | 0.35, -0.43                                                                    | 0.41, -0.68                                                                     |

$$R_1 = \frac{\sum ||F_o| - |F_c||}{\sum |F_o|}, \quad wR_2 = \left[ \frac{\sum [w (F_o^2 - F_c^2)^2]}{\sum [w (F_o^2)^2]} \right]^{1/2}$$

## 2. BVS Results

**Table S2.** BVS results for the vanadium ions, cobalt ion and nickel ions in V-Co-MOF and V-Ni-MOF.

| Metal site      | BVS cacl. | Assigned O.S. |
|-----------------|-----------|---------------|
| <b>V-Co-MOF</b> |           |               |
| V1              | 5.363     | 5             |
| Co1             | 2.234     | 2             |
| <b>V-Ni-MOF</b> |           |               |
| V1              | 5.218     | 5             |
| V2              | 5.234     | 5             |
| Ni1             | 2.109     | 2             |

## 3. XPS Spectra of V-Co-MOF and V-Ni-MOF

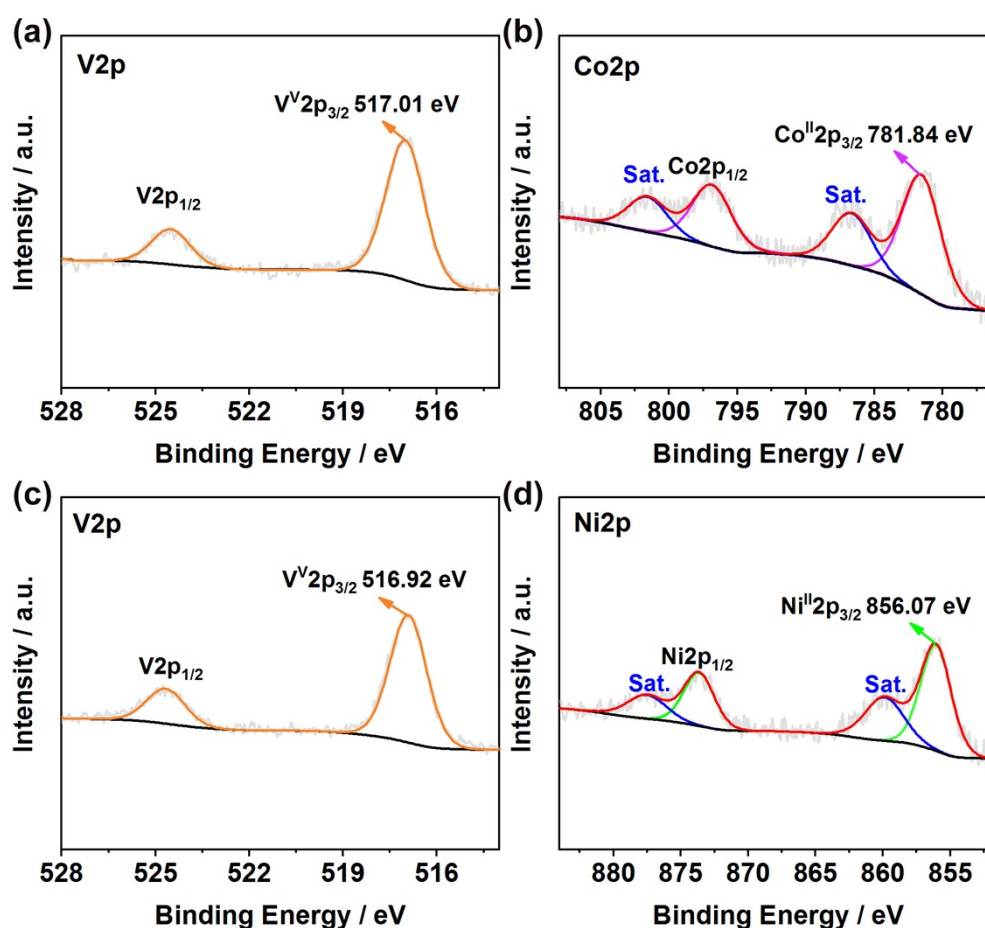

**Figure S1.** (a, b) XPS spectra of V ions and Co ions in V-Co-MOF. (c, d) XPS spectra of V ions and Ni ions in V-Ni-MOF.

#### 4. PXRD Patterns of V-Co-MOF and V-Ni-MOF

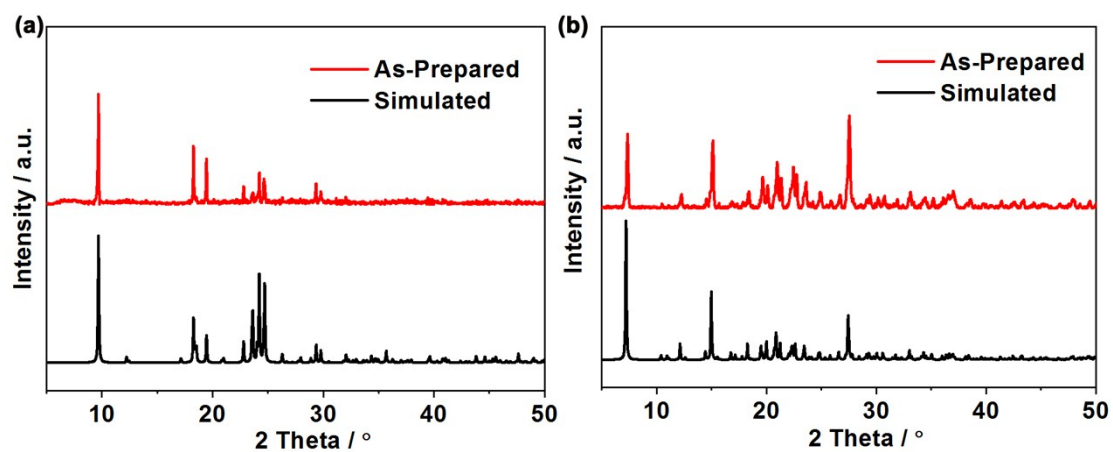

Figure S2. PXRD patterns of V-Co-MOF and V-Ni-MOF.

#### 5. FTIR Spectra of V-Co-MOF and V-Ni-MOF

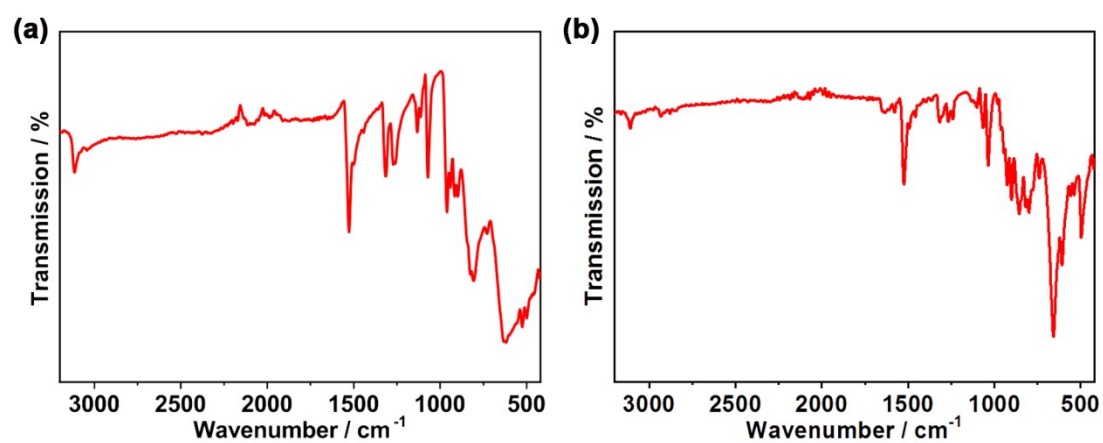

Figure S3. (a) The FTIR spectrum of V-Co-MOF. (b) The FTIR spectrum of V-Ni-MOF.

## 6. TGA Curves of V-Co-MOF and V-Ni-MOF

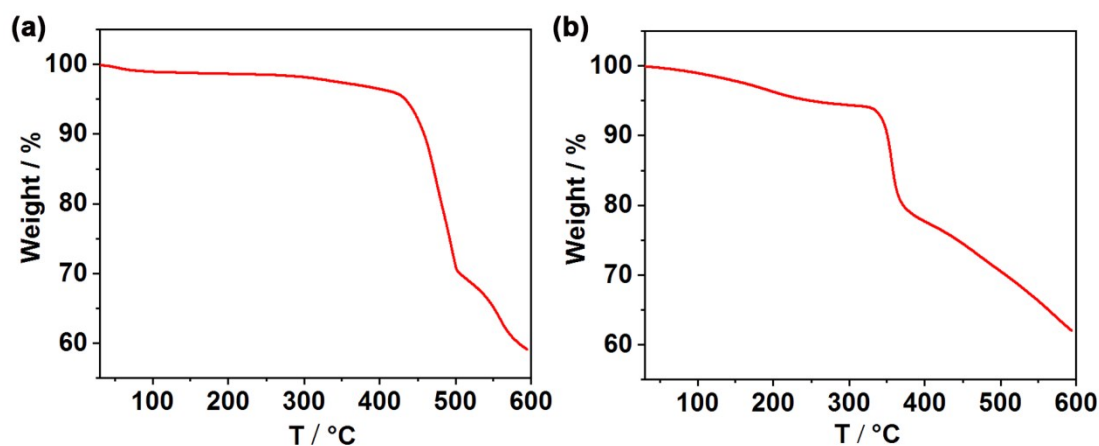

**Figure S4.** (a) The TGA curve of V-Co-MOF. (b) The TGA curve of V-Ni-MOF.

## 7. BET Analysis of V-Co-MOF and V-Ni-MOF

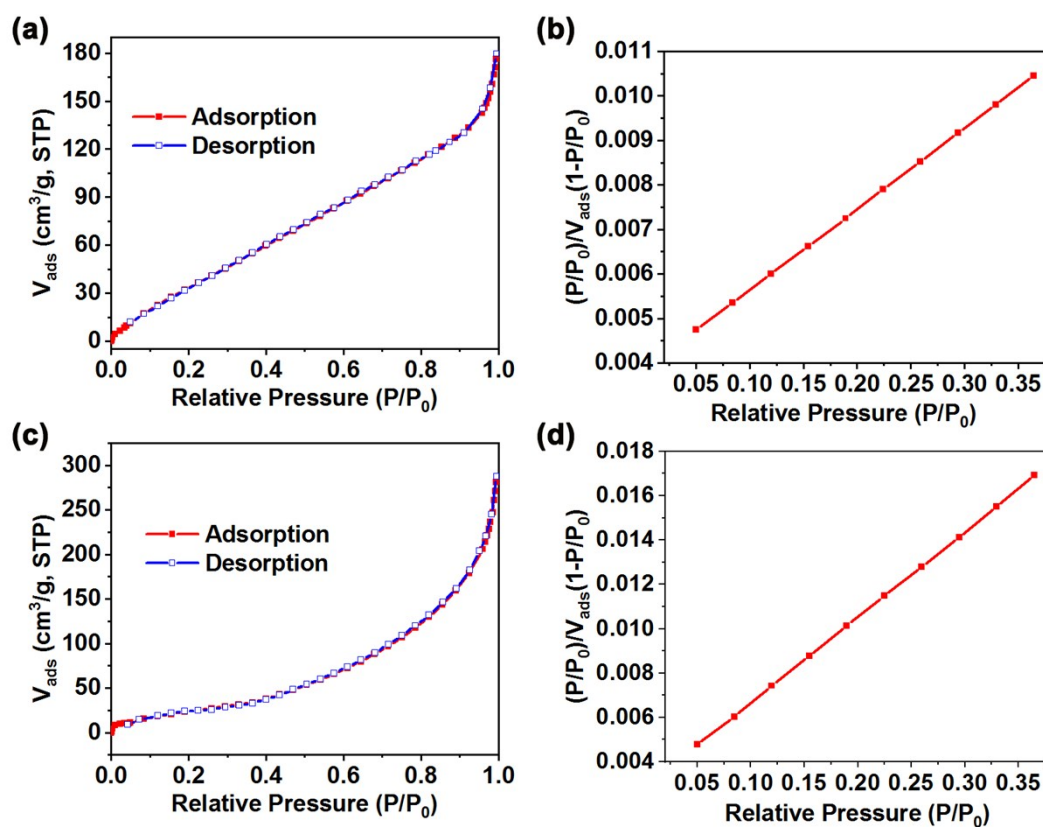

**Figure S5.** BET analysis of V-Co-MOF (a, b) and V-Ni-MOF (c, d). The N<sub>2</sub> adsorption / desorption isotherms were measured at 77K ( $P_0 = 101$  kPa).

## 8. Mass Spectrum of CEESO

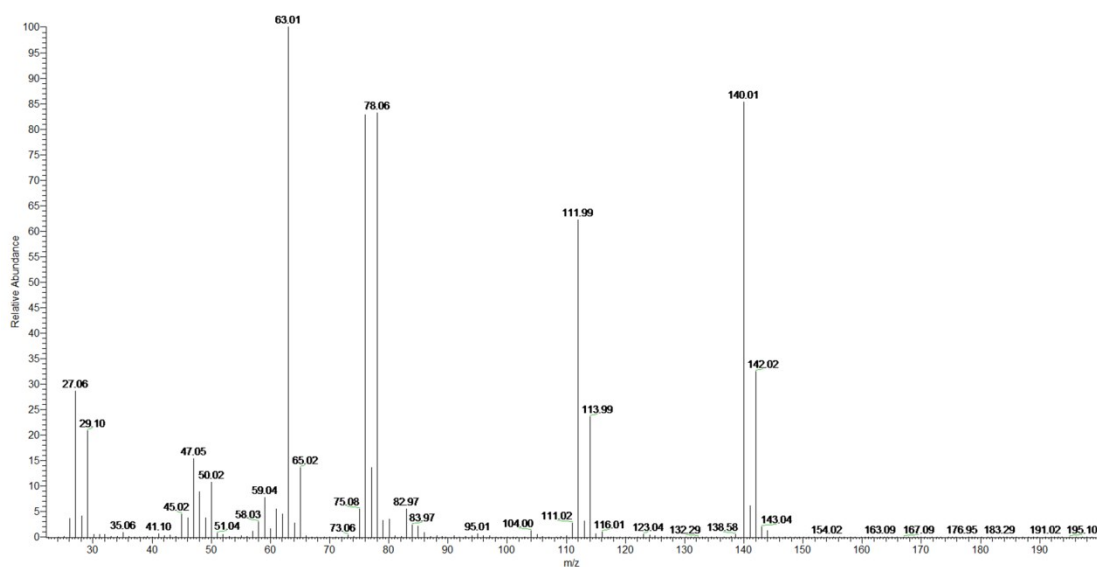

Figure S6. Mass spectrum of CEESO. The mass spectrum was tested after catalytic reaction of CEES.

## 9. $^1\text{H-NMR}$ Spectra of CEES Oxidation Process with V-Co-MOF as Catalyst.

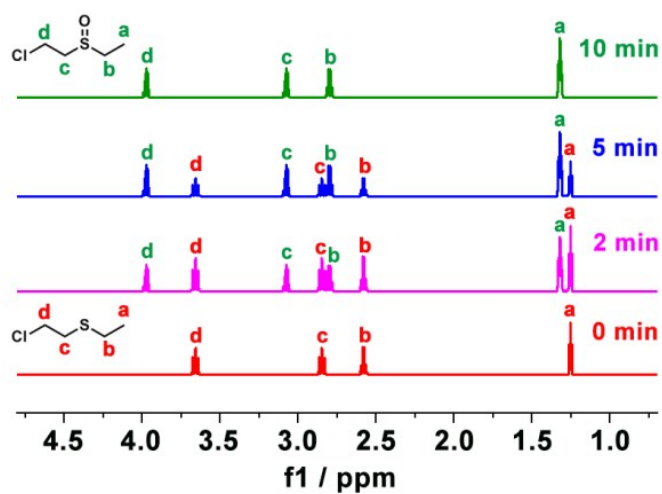

Figure S7.  $^1\text{H-NMR}$  spectra of CEES oxidation process with V-Co-MOF as catalyst. Reaction condition: CEES (0.25 mmol), 30%  $\text{H}_2\text{O}_2$  (0.30mmol), V-Co-MOF (0.025mmol), and EtOH (2.0 mL) at 25  $^\circ\text{C}$  for 10 min and analyzed by  $^1\text{H-NMR}$  ( $\text{CDCl}_3$ ).

## 10. The influence of the Quantity of Catalyst and Oxidant for CEES Oxidation.

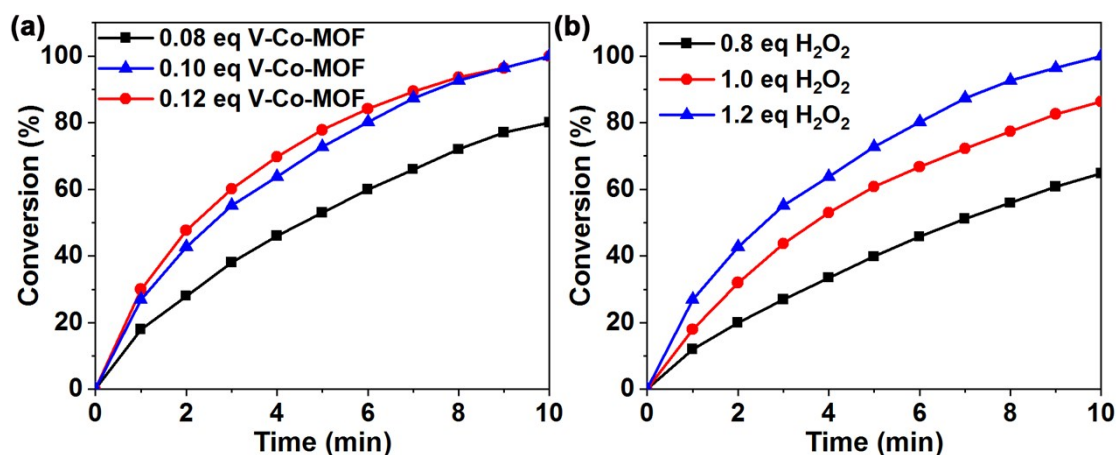

**Figure S8.** (a) The influence of catalyst amount for the oxidation of CEES with V-Co-MOF as catalyst. (b) The influence of oxidant amount for the oxidation of CEES with V-Co-MOF as catalyst.

## 11. Kinetic Analysis of CEES Oxidation for V-Co-MOF and V-Ni-MOF

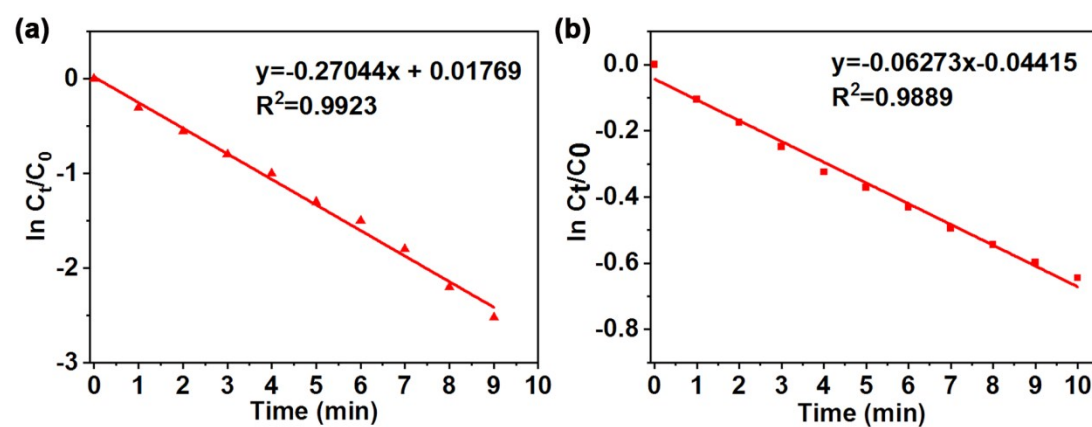

**Figure S9.** The kinetic analysis of CEES oxidation for V-Co-MOF (a) and V-Ni-MOF (b) ( $\ln(C_t/C_0)$  versus reaction time).



## 12. PXRD Patterns of NaK{V<sub>2</sub>O<sub>6</sub>}

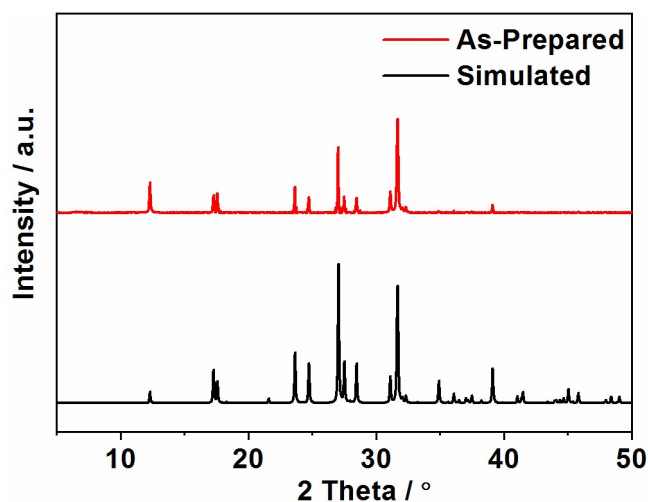

**Figure S10.** The PXRD patterns of NaK{V<sub>2</sub>O<sub>6</sub>}.

## 13. FTIR Spectra of CEES Molecules Absorbed on V-Co-MOF and V-Ni-MOF

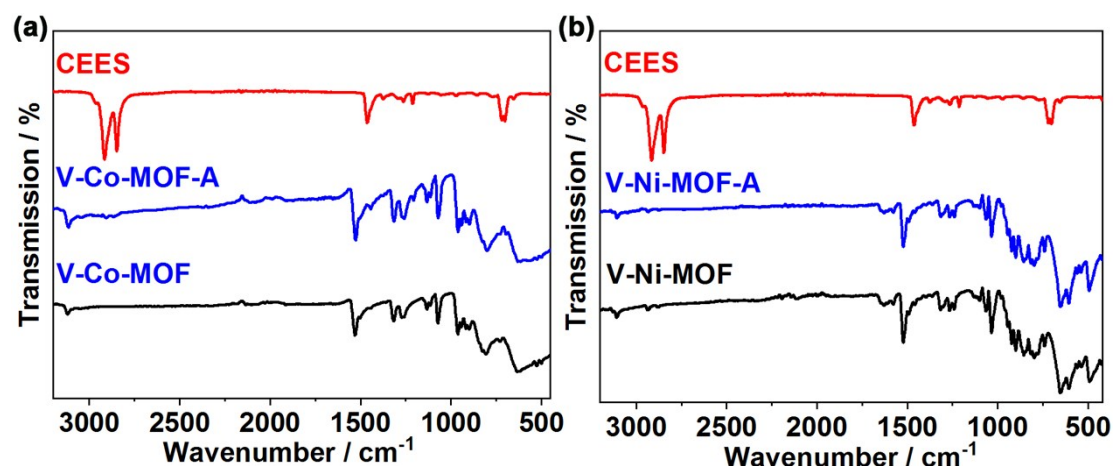

**Figure S11.** The FTIR spectra of V-Co-MOF (a) and V-Ni-MOF (b) before and after absorbing CEES, and the FTIR spectrum of CEES. Note: A = After absorbing CEES.

The treatment procedure of the samples (V-Co-MOF-A and V-Ni-MOF-A) before testing FTIR spectra: CEES (0.25 mmol), V-Co-MOF or V-Ni-MOF (0.025 mmol) and EtOH (2 mL) were placed in 10mL sealed vial and stirred at 25 °C for 60 min. Then we removed the external CEES by centrifugation and the obtained solids were washed with fresh EtOH. Finally the solids were dried at room temperature and named as V-Co-MOF-A or V-Ni-MOF-A.

#### 14. XPS Spectra of $\text{Co}^{2+}$ in V-Co-MOF-A and $\text{Ni}^{2+}$ in V-Ni-MOF-A

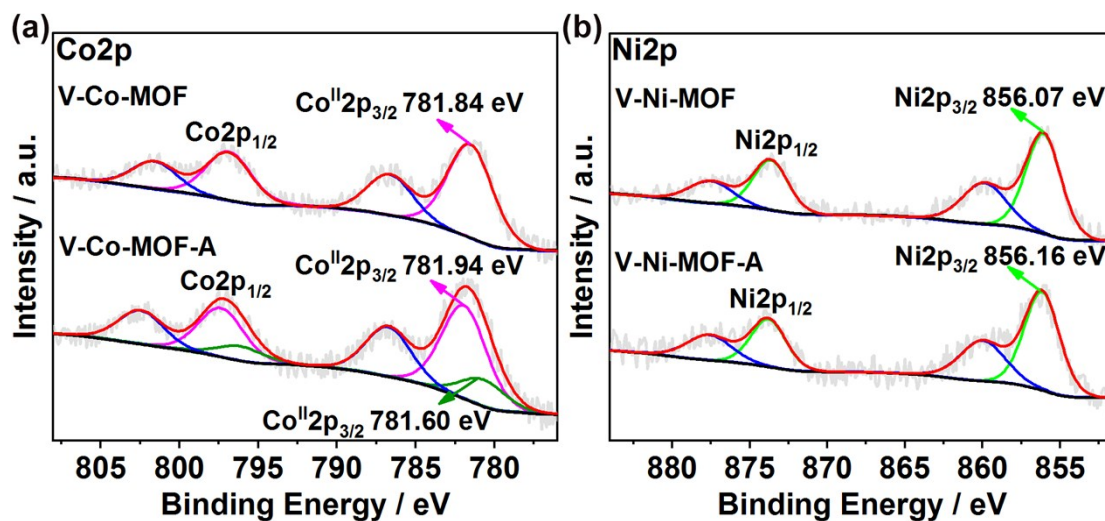

**Figure S12.** XPS spectra of  $\text{Co}^{2+}$  in V-Co-MOF-A (a) and  $\text{Ni}^{2+}$  in V-Ni-MOF-A (b).

Note: A = After absorbing CEES.

#### 15. FTIR Spectra and Raman Spectra of V-Co-MOF-treating with 30% $\text{H}_2\text{O}_2$

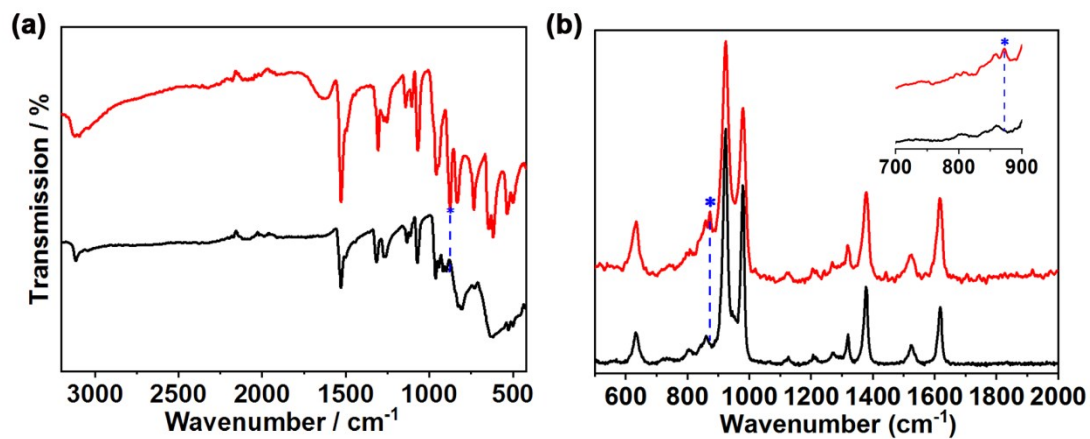

**Figure S13.** (a) FTIR spectra of V-Co-MOF before (black line) and after (red line)

treating with 30%  $\text{H}_2\text{O}_2$ . (b) Raman spectra of V-Co-MOF before (black line) and

after (red line) treating with 30%  $\text{H}_2\text{O}_2$ .

## 16. Comparison of CEES Catalytic Oxidation by Different Catalysts

**Table S3.** Comparison of CEES catalytic oxidation by different POVs and POMOFs catalysts.

| Entry | Catalyst                                                                 | Time (min) | Oxidant                       | T<br>(°C) | Conv.(%) | Sulfoxide selectivity<br>(%) | Refs.     |
|-------|--------------------------------------------------------------------------|------------|-------------------------------|-----------|----------|------------------------------|-----------|
| 1     | V-Co-MOF                                                                 | 10         | H <sub>2</sub> O <sub>2</sub> | 25        | 100      | 100                          | This work |
| 2     | V-Ni-MOF                                                                 | 10         | H <sub>2</sub> O <sub>2</sub> | 25        | 47.5     | 100                          | This work |
| 3     | PNb <sub>12</sub> V <sup>V</sup> V <sub>4</sub> <sup>IV</sup>            | 60         | H <sub>2</sub> O <sub>2</sub> | 25        | 100      | 67                           | [1]       |
| 4     | V <sub>6</sub> O <sub>11</sub> (OMe) <sub>8</sub>                        | 240        | H <sub>2</sub> O <sub>2</sub> | 25        | 100      | 85                           | [2]       |
| 5     | TBA-polyV <sub>6</sub>                                                   | 30         | H <sub>2</sub> O <sub>2</sub> | 25        | 99       | 100                          | [3]       |
| 6     | H <sub>5</sub> PV <sub>2</sub> Mo <sub>10</sub> O <sub>40</sub> @MIL-101 | 120        | O <sub>2</sub>                | 25        | 97.4     | 100                          | [4]       |
| 7     | PW <sub>12</sub> @NU-1000                                                | 20         | H <sub>2</sub> O <sub>2</sub> | 45        | 98       | 57                           | [5]       |
| 8     | PW <sub>12</sub> @NU-1000-scCO <sub>2</sub>                              | 5          | H <sub>2</sub> O <sub>2</sub> | 45        | 100      | 90                           | [6]       |
| 9     | PV <sub>2</sub> Mo <sub>10</sub> @ NU-1000                               | 45         | O <sub>2</sub>                | 70        | 100      | <100                         | [7]       |

## 17. References

- 1 J. Dong, J. Hu, Y. Chi, Z. Lin, B. Zou, S. Yang, C. L. Hill and C. Hu, *Angew. Chem. Int. Ed.*, 2017, **56**, 4473-4477.
- 2 J.-K. Li, J. Dong, C.-P. Wei, S. Yang, Y.-N. Chi, Y.-Q. Xu and C.-W. Hu, *Inorg. Chem.*, 2017, **56**, 5748-5756.
- 3 K. P. Sullivan, W. A. Neiwert, H. Zeng, A. K. Mehta, Q. Yin, D. A. Hillesheim, S. Vivek, P. Yin, D. L. Collins-Wildman, E. R. Weeks, T. Liu and C. L. Hill, *Chem. Commun.*, 2017, **53**, 11480-11483.
- 4 Y. Li, Q. Gao, L. Zhang, Y. Zhou, Y. Zhong, Y. Ying, M. Zhang, C. Huang and Y. a. Wang, *Dalton Trans.*, 2018, **47**, 6394-6403.
- 5 C. T. Buru, P. Li, B. L. Mehdi, A. Dohnalkova, A. E. Platero-Prats, N. D. Browning, K. W. Chapman, J. T. Hupp and O. K. Farha, *Chem. Mater.*, 2017, **29**, 5174-5181.
- 6 C. T. Buru, A. E. Platero-Prats, D. G. Chica, M. G. Kanatzidis, K. W. Chapman and O. K. Farha, *J. Mater. Chem. A*, 2018, **6**, 7389-7394.
- 7 C. T. Buru, M. C. Wasson and O. K. Farha, *ACS Appl. Nano Mater.*, 2019, **3**, 658-664.
